# Supplementary material
Source: publisher figshare collection journal article supplement (https://geolsoc.figshare.com/ndownloader/files/34496346)
Supplement: Supplementary file 1 [file 34496346]

## Sheet: occurrences
Localities	Province	Depno	N(number of analysis)	XUTM	YUTM	Average_TC	Tonnage Mt)	Contained (Mt)	Resource est
Trælen	Senja	1	1	586190	7711245	25	1.8	0.56	1
Bukken	Senja	2	28	611995	7.70471e+06	6.54	51.0256	3.33708	1
Grunnvåg	Senja	3	49	618153	7.70226e+06	3.97649	22.7661	1.19067	1
Hesten	Senja	4	21	609366	7.70258e+06	5.77405	2.06695	0.119263	1
Vardfjellet	Senja	5	37	607763	7.70504e+06	9.19041	12.8423	1.18021	1
Alsvåg	Vesterålen	6	5	511211	7.64358e+06	8.906	0.253988	0.0226049	1
Bjønndalen	Vesterålen	7	18	486632	7.62885e+06	10.0024			1
Evassåsen	Vesterålen	8	6	514701	7.62202e+06	7.56667	2.11657	0.160859	1
Golia	Vesterålen	9	8	510932	7.62536e+06	17.5972			0
Græva	Vesterålen	10	20	507273	7.62562e+06	31.371			0
Grønjorda	Vesterålen	11	7	502077	7.62884e+06	10.1386			0
Haugsneset	Vesterålen	12	11	488349	7.61953e+06	16.2	8.40417	1.36148	1
Hornvatnet	Vesterålen	13	69	507421	7.62564e+06	22.0324	0.5		0
Høgdene	Vesterålen	14	7	486456	7.62831e+06	9.29029			1
Instøya	Vesterålen	15	28	512575	7.64436e+06	9.28393	14.816	1.37788	1
Kaldhammaren	Vesterålen	16	14	498954	7.63937e+06	9.57929			0
Kjerkhaugen	Vesterålen	17	2	484006	7.62222e+06	6.46	2.41944	0.157263	1
Koven	Vesterålen	18	11	510108	7.62504e+06	14.8625			0
Langstrand	Vesterålen	19	8	500619	7.63401e+06	13.745			0
Larmarkvatnet	Vesterålen	20	5	510369	7625405	9.72			0
Lille Hornvatnet	Vesterålen	21	38	508517	7.62575e+06	13.7666			0
Morfjord mine	Vesterålen	22	7	487528	7.58832e+06	11.3743			0
Rise	Vesterålen	23	2	483859	7.62405e+06	7.9	0.187221	0.0147905	1
Romset	Vesterålen	24	5	500562	7.63478e+06	14.724	9.62748	1.41524	1
Rødhamran	Vesterålen	25	15	505798	7.64219e+06	13.8471	1.38254	0.204615	1
Selåter	Vesterålen	26	7	487671	7.58858e+06	6.29714			0
Skalvneset	Vesterålen	27	18	498184	7640374	23.0503			0
Skarsvåg	Vesterålen	28	30	617058	7.70975e+06	1.01141			0
Møkland	Vesterålen	29	19	486162	7.62771e+06	13.2	3.40341	0.449251	1
Smines	Vesterålen	30	4	499016	7.63866e+06	7.96575	18.8858	1.34089	1
Sommarhus	Vesterålen	31	7	486993	7.58895e+06	24.0714			0
Sommarland	Vesterålen	32	15	487664	7.62638e+06	12.4787	0.846626	0.105828	1
Stavdalen	Vesterålen	33	7	504847	7640698	1.212			0
Storå	Vesterålen	34	1	511084	7.59443e+06	10.5			0
Straumen	Vesterålen	35	5	509777	7.64516e+06	11.712			0
Svinøya	Vesterålen	36	4	498342	7639890	8.82	0.169325	0.0198111	1
Sæterbukta	Vesterålen	37	3	500143	7.63733e+06	7.29333			0
Sæterstranda	Vesterålen	38	3	514266	7.63839e+06	16.9			0
Sørfjorden	Vesterålen	39	1	531769	7.61805e+06	29.4			0
Vedåsen	Vesterålen	40	6	510942	7.62842e+06	13.8	8.88958	1.22676	1
Vestpolltinden	Vesterålen	41	1	523901	7.60066e+06	27.1			0
Vikeid	Vesterålen	42	12	509313	7.62786e+06	10.4192			0
Øynes	Vesterålen	43	4	543304	7.63137e+06	17.1525			0
Ånstad	Vesterålen	44	5	515606	7.62338e+06	36.82	0.211657	0.0778896	1
						13.3648	8.13074	0.75381
							162.615	14.3224

## Sheet: comparison
Average_TC	Norwegian	International
6.54	51.0256
3.97649	22.7661
7.96575	18.8858
9.28393	14.816
9.19041	12.8423
14.724	9.62748
13.8	8.88958
16.2	8.40417
13.2	3.40341
6.46	2.41944
7.56667	2.11657
5.77405	2.06695
25	1.8
13.8471	1.38254
12.4787	0.846626
22.0324	0.5
8.906	0.253988
36.82	0.211657
7.9	0.187221
8.82	0.169325
12.3		2.53
4.5		19.3
17		1.76
6.5		17.7
10.2		2.8
15.13		7.87
4.73		7.135
15.1		2.2
27.8		4.7
6.4		141.28
1.7		69.8
9.4		4.3
5.2		5.7
10.2		113.29
25.3		12.3
5.52		103
7.1		6.47

## Sheet: international occurrences
No_fig	province	Deposit/company name	Aveage TC	tonnage(Mt)	contained graphite (Mt)	Reference	access date
35	International	Archer	12.3	2.53	0.31	https://archerx.com.au	2020-02-19
45	International	Beowulf	4.5	19.3	0.87	https://beowulfmining.com/projects/fennoscandian-finland-graphite/aitolampi/	2020-02-23
44	International	Berkwood	17	1.76	0.31	https://berkwoodresources.com/	2020-02-19
33	International	Eco graphite	6.5	17.7	1.15	https://www.ecograf.com	2020-02-19
39	International	Flinders Resources	10.2	2.8	0.3	https://leadingedgematerials.com/woxna-graphite/	2020-02-19
42	International	Fokus graphite	15.13	7.87	1.19	http://www.focusgraphite.com/	2020-02-19
32	International	Lambo	4.73	7.135	0.33	no link (liquidated?)
36	International	Lincoln Minerals	15.1	2.2	0.33	https://www.lincolnminerals.com.au/	2020-02-19
40	International	Mason graphite	27.8	4.7	1.3	http://masongraphite.com/	2020-02-19
41	International	Nextsource materials	6.4	141.28	9.02	http://www.nextsourcematerials.com/graphite/molo-graphite-project/	2020-02-19
37	International	Northern graphite	1.7	69.8	1.61	http://www.northerngraphite.com/	2020-02-19
43	International	Strategic energy resources	9.4	4.3	0.58	https://www.strategicenergy.com.au/	2020-02-19
38	International	StratMin	5.2	5.7	0.23	https://sites.google.com/site/stratminglobalresource/	2020-02-19
29	International	Syrah	10.2	113.29	11.6	http://www.syrahresources.com.au/balama-project	2020-02-19
34	International	Talga	25.3	12.3	3.11	www.talgaresources.com/	2020-02-19
31	International	Triton	5.52	103	5.72	https://www.tritonminerals.com/projects/	19.02.202
30	International	Valence	7.1	6.47	0.46	no link (liquidated?)

## Sheet: drill_hole_collar
ID	UTM SONE	XUTM	YUTM
13008	32	510456	7.62528e+06
13010	32	510692	7.62534e+06
13012	32	510832	7.6254e+06
haug1702	32	488293	7618843
haug1701	32	488285	7618843
